# Supplementary material for: Binding mechanism of nine N-phenylpiperazine derivatives and α1A-adrenoceptor using site-directed molecular docking and high performance affinity chromatography
Source: Royal Society of Chemistry journal article supplement (doi:10.1039/c5ra10812h), 2015-01-01

Suppo

Fig.1. Structural-based alignment of  $\alpha_{1A}$ -AR (PDB ID: 3SNE). The sequence shaded in cyan represents sequence similarity

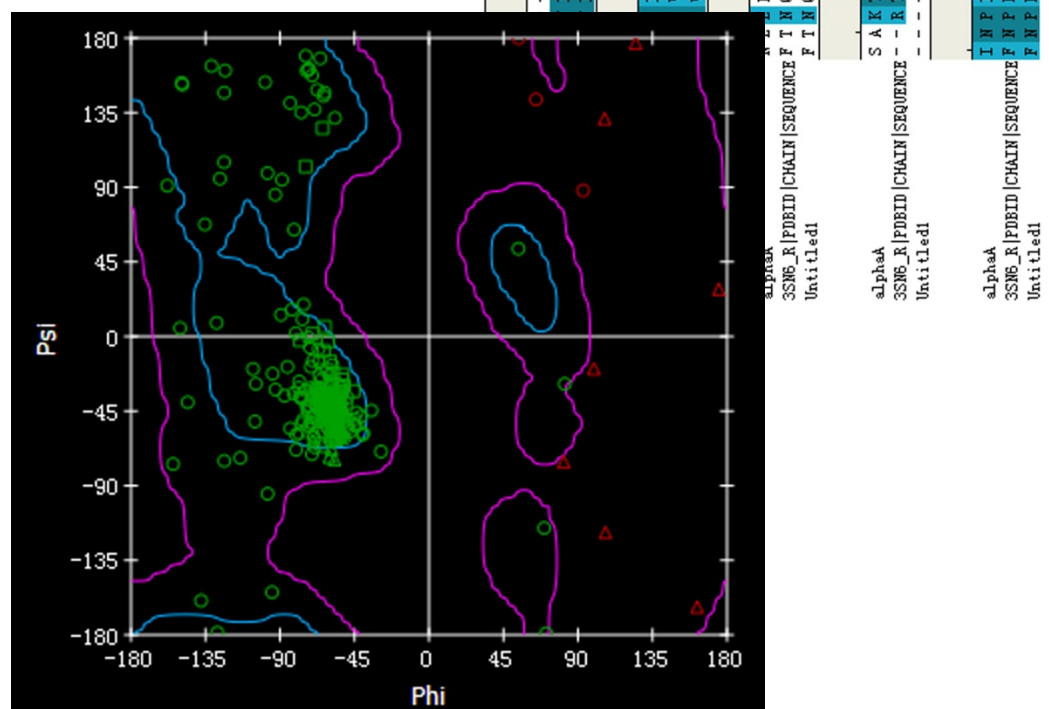

Fig.2. Ramachandran plot of the  $\alpha_{1A}$ -AR model calculated by PROCHECK

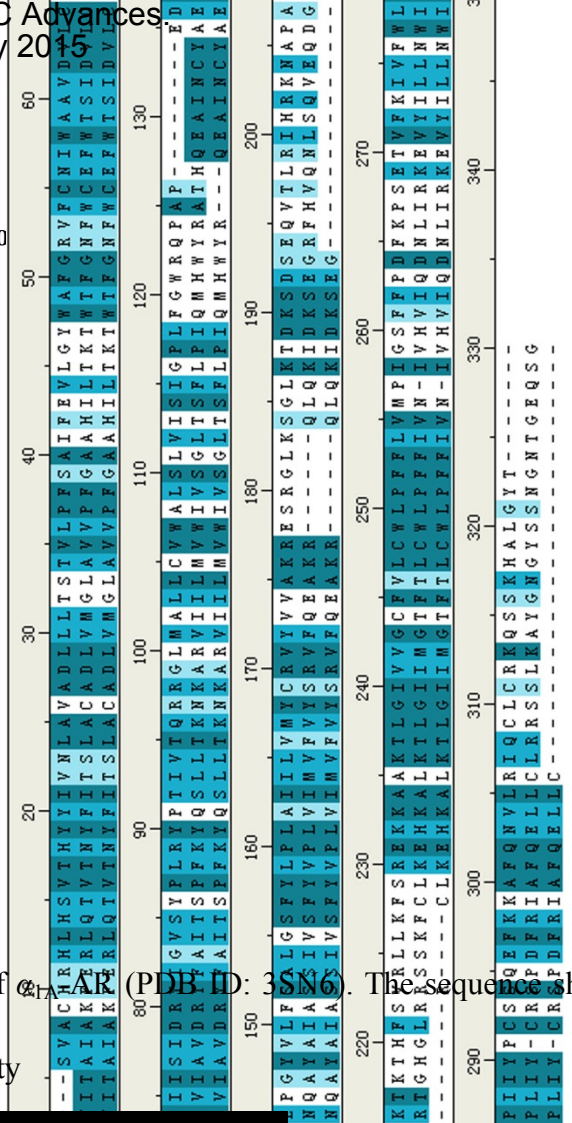

Supplement: c5ra10812h1.pdf [file c5ra10812h1.pdf]
